# Supplementary material for: Phylogeny and Mycotoxin Profile of Pathogenic Fusarium Species Isolated from Sudden Decline Syndrome and Leaf Wilt Symptoms on Date Palms (Phoenix dactylifera) in Tunisia
Source: MDPI journal article supplement (doi:10.3390/toxins13070463), 2021-06-30
Supplement: s1 [file s1]

# Supplementary Materials: Phylogeny and Mycotoxin Profile of Pathogenic *Fusarium* species Isolated from Sudden Decline Syndrome and Leaf Wilt Symptoms, on Date Palm (*Phoenix dactylifera*), in Tunisia

Amal Rabaaoui, Chiara Dall'Asta, Laura Righetti, Antonia Susca, Antonio F. Logrieco, Ahmed Namsi, Radhouane Gdoura, Stefaan P. O. Werbrout, Antonio Moretti and Mario Masiello

**Table S1.** Pathogenicity of 51 *Fusarium* strains selected for pathogenicity assay. For each experiment, 3 replications consisting of 3 plants per replicate were considered. Data were analyzed using one-way ANOVA, followed by means separation using Duncan test at  $p \leq 0.05$ .

| Strain (ITEM) | <i>Fusarium</i> species | Part of Plant | Origin      | DSI*                 |
|---------------|-------------------------|---------------|-------------|----------------------|
| 18583         | <i>F. proliferatum</i>  | Leaves        | El-Hamma    | 38.9 <sup>a*</sup>   |
| 18584         | <i>F. proliferatum</i>  | Leaves        | El-Hamma    | 50 <sup>abcd</sup>   |
| 18595         | <i>F. proliferatum</i>  | Leaves        | El-Hamma    | 50 <sup>abcd</sup>   |
| 18592         | <i>F. proliferatum</i>  | Leaves        | El-Hamma    | 47.2 <sup>abcd</sup> |
| Mean value    |                         |               |             | 46.5                 |
| 18585         | <i>F. proliferatum</i>  | Leaves        | Hezoua      | 55.6 <sup>abcd</sup> |
| 18586         | <i>F. proliferatum</i>  | Leaves        | Hezoua      | 50 <sup>abcd</sup>   |
| 18590         | <i>F. proliferatum</i>  | Leaves        | Hezoua      | 44.4 <sup>abcd</sup> |
| 18591         | <i>F. proliferatum</i>  | Leaves        | Hezoua      | 41.7 <sup>ab</sup>   |
| 18594         | <i>F. proliferatum</i>  | Leaves        | Hezoua      | 44.4 <sup>abc</sup>  |
| 18605         | <i>F. proliferatum</i>  | Leaves        | Hezoua      | 63.9 <sup>abcd</sup> |
| 18620         | <i>F. proliferatum</i>  | Leaves        | Hezoua      | 63.9 <sup>abcd</sup> |
| Mean value    |                         |               |             | 52                   |
| 18593         | <i>F. proliferatum</i>  | Leaves        | IBN Chabbat | 72.2 <sup>abcd</sup> |
| 18601         | <i>F. proliferatum</i>  | Leaves        | IBN Chabbat | 63.9 <sup>abcd</sup> |
| 18612         | <i>F. proliferatum</i>  | Leaves        | IBN Chabbat | 83.3 <sup>d</sup>    |
| 18597         | <i>F. proliferatum</i>  | Leaves        | IBN Chabbat | 69.4 <sup>abcd</sup> |
| 18600         | <i>F. proliferatum</i>  | Leaves        | IBN Chabbat | 72.2 <sup>abcd</sup> |
| 18588         | <i>F. proliferatum</i>  | Roots         | IBN Chabbat | 61.1 <sup>abcd</sup> |
| 18587         | <i>F. proliferatum</i>  | Roots         | IBN Chabbat | 72.2 <sup>abcd</sup> |
| Mean value    |                         |               |             | 70.6                 |
| 18608         | <i>F. proliferatum</i>  | Leaves        | Mides       | 75 <sup>bcd</sup>    |
| 18609         | <i>F. proliferatum</i>  | Leaves        | Mides       | 66.7 <sup>abcd</sup> |
| 18626         | <i>F. proliferatum</i>  | Leaves        | Mides       | 66.7 <sup>abcd</sup> |
| 18598         | <i>F. proliferatum</i>  | Leaves        | Mides       | 75 <sup>bcd</sup>    |
| 18614         | <i>F. proliferatum</i>  | Leaves        | Mides       | 69.4 <sup>abcd</sup> |
| 18615         | <i>F. proliferatum</i>  | Leaves        | Mides       | 66.7 <sup>abcd</sup> |
| 18589         | <i>F. proliferatum</i>  | Leaves        | Mides       | 75 <sup>bcd</sup>    |
| 18627         | <i>F. proliferatum</i>  | Leaves        | Mides       | 69.4 <sup>cd</sup>   |
| Mean value    |                         |               |             | 70.5                 |
| 18607         | <i>F. proliferatum</i>  | Leaves        | Tozeur      | 72.2 <sup>abcd</sup> |
| 18623         | <i>F. proliferatum</i>  | Leaves        | Tozeur      | 75 <sup>abcd</sup>   |
| 18625         | <i>F. proliferatum</i>  | Leaves        | Tozeur      | 80.6 <sup>abcd</sup> |

|                                     |                          |        |             |                      |
|-------------------------------------|--------------------------|--------|-------------|----------------------|
| 18610                               | <i>F. proliferatum</i>   | Leaves | Tozeur      | 61.1 <sup>abcd</sup> |
| 18606                               | <i>F. proliferatum</i>   | Leaves | Tozeur      | 58.3 <sup>abcd</sup> |
| <b>Mean value</b>                   |                          |        |             | <b>69.4</b>          |
| 18596                               | <i>F. proliferatum</i>   | Leaves | Dgeuch      | 63.9 <sup>abcd</sup> |
| 18621                               | <i>F. proliferatum</i>   | Leaves | Dgeuch      | 47.2 <sup>abcd</sup> |
| 18619                               | <i>F. proliferatum</i>   | Leaves | Dgeuch      | 50 <sup>abcd</sup>   |
| <b>Mean value</b>                   |                          |        |             | <b>53.7</b>          |
| 18604                               | <i>F. proliferatum</i>   | Leaves | Nafta       | 63.9 <sup>abcd</sup> |
| 18628                               | <i>F. proliferatum</i>   | Leaves | Nafta       | 52.8 <sup>abcd</sup> |
| 18629                               | <i>F. proliferatum</i>   | Leaves | Nafta       | 58.3 <sup>abcd</sup> |
| <b>Mean value</b>                   |                          |        |             | <b>58.3</b>          |
| <i>Fusarium proliferatum</i>        |                          |        |             | <b>MIN</b>           |
|                                     |                          |        |             | <b>38.9</b>          |
|                                     |                          |        |             | <b>MAX</b>           |
|                                     |                          |        |             | <b>83.3</b>          |
| <b>Mean value</b>                   |                          |        |             | <b>61.9</b>          |
| 18630                               | <i>F. incarnatum</i>     | Roots  | Mides       | 88.9 <sup>a</sup>    |
| 18631                               | <i>F. caatingaense</i>   | Leaves | Tozeur      | 58.3 <sup>ab</sup>   |
| 18632                               | <i>F. caatingaense</i>   | Leaves | Tozeur      | 63.9 <sup>ab</sup>   |
| 18633                               | <i>F. caatingaense</i>   | Roots  | Tozeur      | 72.2 <sup>b</sup>    |
| 18634                               | <i>F. clavum</i>         | Leaves | IBN Chabbat | 80.6 <sup>ab</sup>   |
| <b>Fusarium Incarnatum Equiseti</b> |                          |        |             | <b>MIN</b>           |
| <b>Species Complex</b>              |                          |        |             | <b>58.3</b>          |
|                                     |                          |        |             | <b>MAX</b>           |
|                                     |                          |        |             | <b>88.9</b>          |
| <b>Mean value</b>                   |                          |        |             | <b>72.8</b>          |
| 18635                               | <i>F. brachygibbosum</i> | Leaves | Mides       | 80.6 <sup>b</sup>    |
| 18637                               | <i>F. brachygibbosum</i> | Leaves | Mides       | 75 <sup>ab</sup>     |
| 18638                               | <i>F. brachygibbosum</i> | Roots  | Hezoua      | 47.2 <sup>ab</sup>   |
| 18639                               | <i>F. brachygibbosum</i> | Leaves | IBN Chabbat | 69.4 <sup>ab</sup>   |
| 18640                               | <i>F. brachygibbosum</i> | Leaves | IBN Chabbat | 63.9 <sup>ab</sup>   |
| 18641                               | <i>F. brachygibbosum</i> | Leaves | El-Hamma    | 41.7 <sup>ab</sup>   |
| 18642                               | <i>F. brachygibbosum</i> | Roots  | El-Hamma    | 47.2 <sup>a</sup>    |
|                                     |                          |        |             | <b>MIN</b>           |
| <i>Fusarium brachygibbosum</i>      |                          |        |             | <b>41.7</b>          |
|                                     |                          |        |             | <b>MAX</b>           |
|                                     |                          |        |             | <b>80.6</b>          |
| <b>Mean value</b>                   |                          |        |             | <b>60.7</b>          |
| 18643                               | <i>F. solani</i>         | Roots  | IBN Chabbat | 72.2 <sup>a</sup>    |
| 18644                               | <i>F. solani</i>         | Leaves | Mides       | 80.6 <sup>a</sup>    |
|                                     |                          |        |             | <b>MIN</b>           |
| <i>Fusarium solani</i>              |                          |        |             | <b>72.2</b>          |
|                                     |                          |        |             | <b>MAX</b>           |
|                                     |                          |        |             | <b>80.6</b>          |
| <b>Mean value</b>                   |                          |        |             | <b>76.4</b>          |

\* DSI =  $\sum [(n \times c) / (V \times N)] \times 100$ , where n is number of palm plantlets per class, c is the numerical value of each class, V is the highest class value, and N is the total number of plantlets. \*\*= a, b, c, d: values followed by the same letter are not significantly different ( $p < 0.05$ ) according to Duncan test.
